# Supplementary material for: Visual Function and Neuropsychological Profile in Children with Cerebral Visual Impairment
Source: MDPI journal article supplement (doi:10.3390/children9060921), 2022-06-19
Supplement: s1 [file s1]

## 1. Variables Distribution

We report the histogram representation of the distribution of the numerical variables concerning cognitive tests and the results of normality tests. Each histogram represents the distribution of a variable (WISC-IQ, WISC-VCI, WISC-PRI, WISC-WMI, WISC-PSI). Shapiro–Wilk tests do not show evidence of non-normality as deduced by the reported  $p$  values.

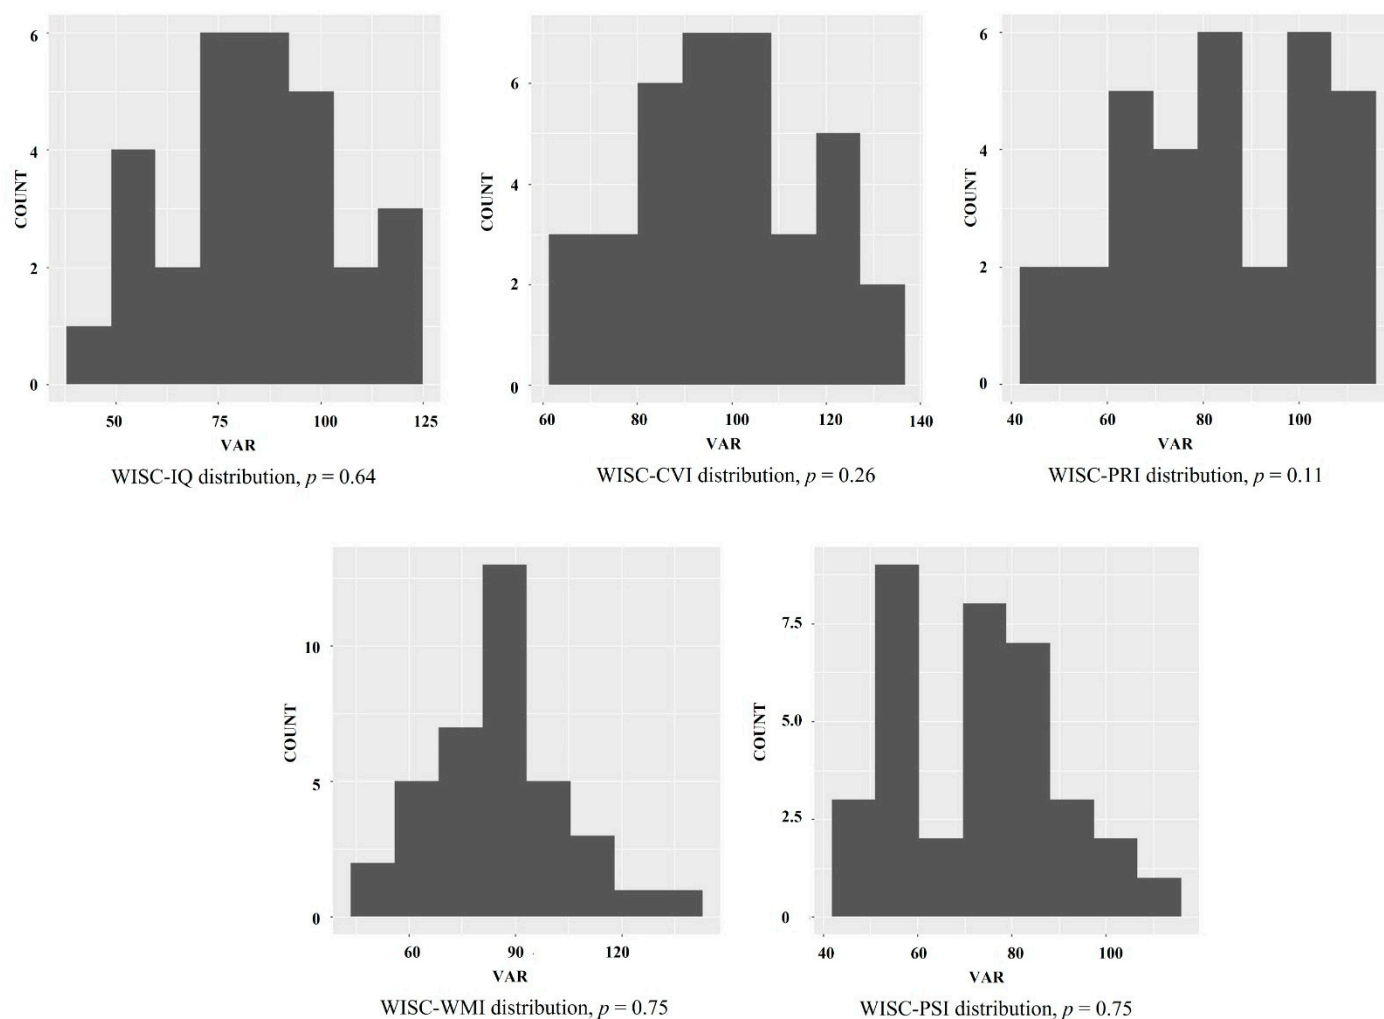

**Figure S1.** Histograms representing the distribution of numerical variables for cognitive tests and the relative  $p$  values obtained with Shapiro–Wilk tests. WISC: Wechsler Intelligence Scale for Children. IQ: Intelligence Quotient. VCI: Verbal Comprehension Index. PRI: Perceptual Reasoning Index. WMI: Working Memory Index. PSI: Processing Speed Index.

## 2. Supplementary Results

For each target variable, an appropriate parametric regression model is built with the following variables as covariates: Neurological Signs, Best Corrected Visual Acuity (for near), Best Corrected Visual Acuity (for distance), Fixation, Smooth Pursuit, Saccades, Ocular Motility, Contrast Sensitivity.

Under the target variable, the global significance of the model is reported.

**Table S1.** Linear regression models for cognitive assessment.

|                    | Coefficient | Standard Error | $t$ Value | $p$ Value |
|--------------------|-------------|----------------|-----------|-----------|
| Neurological Signs | −2.0036     | 3.0100         | −0.666    | 0.512     |

|                                                                                                                                         |                                                |          |         |        |           |
|-----------------------------------------------------------------------------------------------------------------------------------------|------------------------------------------------|----------|---------|--------|-----------|
| <b>WISC-VCI</b><br><b>(Verbal</b><br><b>Comprehension</b><br><b>Index)</b><br><b>overall</b><br><b>significance</b><br><b>p = 0.133</b> | Best Corrected Visual Acuity<br>(for near)     | 3.4535   | 4.4744  | 0.772  | 0.447     |
|                                                                                                                                         | Best Corrected Visual Acuity<br>(for distance) | 0.8335   | 3.6729  | 0.227  | 0.822     |
|                                                                                                                                         | Fixation                                       | 9.7140   | 6.1128  | 1.589  | 0.125     |
|                                                                                                                                         | Smooth Pursuit                                 | −13.6268 | 8.3445  | −1.633 | 0.115     |
|                                                                                                                                         | Saccades                                       | −1.5589  | 7.8697  | −0.198 | 0.845     |
|                                                                                                                                         | Ocular Motility                                | −5.6862  | 5.5031  | −1.033 | 0.311     |
|                                                                                                                                         | Contrast Sensitivity                           | −11.2218 | 6.3845  | −1.758 | 0.091     |
| <b>WISC-PRI</b><br><b>(Perceptual</b><br><b>Reasoning Index)</b><br><b>overall</b><br><b>significance</b><br><b>p = 0.014</b>           | Neurological Signs                             | 3.301    | 3.195   | 1.033  | 0.3133    |
|                                                                                                                                         | Best Corrected Visual Acuity<br>(for near)     | 6.300    | 5.144   | 1.225  | 0.2342    |
|                                                                                                                                         | Best Corrected Visual Acuity<br>(for distance) | −15.106  | 4.106   | −3.679 | 0.0014 ** |
|                                                                                                                                         | Fixation                                       | 2.388    | 8.566   | 0.279  | 0.7832    |
|                                                                                                                                         | Smooth Pursuit                                 | −16.416  | 9.297   | −1.766 | 0.0920 .  |
|                                                                                                                                         | Saccades                                       | −8.715   | 8.345   | −1.044 | 0.3082    |
|                                                                                                                                         | Ocular Motility                                | 3.138    | 6.441   | 0.487  | 0.6312    |
| <b>WISC-WMI</b><br><b>(Working</b><br><b>Memory Index)</b><br><b>overall</b><br><b>significance</b><br><b>p = 0.039</b>                 | Contrast Sensitivity                           | −14.283  | 7.342   | −1.945 | 0.0652    |
|                                                                                                                                         | Neurological Signs                             | 2.593    | 3.758   | 0.690  | 0.4961    |
|                                                                                                                                         | Best Corrected Visual Acuity<br>(for near)     | 8.880    | 5.695   | 1.559  | 0.1306    |
|                                                                                                                                         | Best Corrected Visual Acuity<br>(for distance) | −9.122   | 4.584   | −1.990 | 0.0568    |
|                                                                                                                                         | Fixation                                       | −1.542   | 7.485   | −0.206 | 0.8383    |
|                                                                                                                                         | Smooth Pursuit                                 | −18.122  | 10.516  | −1.723 | 0.0963    |
|                                                                                                                                         | Saccades                                       | −3.138   | 9.636   | −0.326 | 0.7472    |
| <b>WISC-PSI</b><br><b>(Processing Speed</b><br><b>Index)</b><br><b>overall</b><br><b>significance</b><br><b>p = 0.123</b>               | Ocular Motility                                | −4.557   | 6.981   | −0.653 | 0.5194    |
|                                                                                                                                         | Contrast Sensitivity                           | −20.609  | 7.876   | −2.616 | 0.0144*   |
|                                                                                                                                         | Neurological Signs                             | 3.732    | 2.931   | 1.273  | 0.21512   |
|                                                                                                                                         | Best Corrected Visual Acuity<br>(for near)     | 9.480    | 4.607   | 2.058  | 0.05064   |
|                                                                                                                                         | Best Corrected Visual Acuity<br>(for distance) | −11.032  | 3.754   | −2.939 | 0.00717** |
|                                                                                                                                         | Fixation                                       | −14.022  | 7.211   | −1.945 | 0.06364   |
|                                                                                                                                         | Smooth Pursuit                                 | −19.419  | 8.164   | −2.379 | 0.02568 * |
| <b>WISC-IQ</b><br><b>(Intelligence</b><br><b>Quotient)</b><br><b>overall</b><br><b>significance</b><br><b>p = 0.301</b>                 | Saccades                                       | 6.900    | 8.294   | 0.832  | 0.41366   |
|                                                                                                                                         | Ocular Motility                                | 1.874    | 5.970   | 0.314  | 0.75630   |
|                                                                                                                                         | Contrast Sensitivity                           | −4.371   | 6.510   | −0.671 | 0.50843   |
|                                                                                                                                         | Neurological Signs                             | 2.5476   | 4.3097  | 0.591  | 0.5618    |
|                                                                                                                                         | Best Corrected Visual Acuity<br>(for near)     | 10.3161  | 7.0759  | 1.458  | 0.1621    |
|                                                                                                                                         | Best Corrected Visual Acuity<br>(for distance) | −10.9858 | 5.6331  | −1.950 | 0.0669    |
|                                                                                                                                         | Fixation                                       | −5.2629  | 11.0749 | −0.475 | 0.6404    |
|                                                                                                                                         | Smooth Pursuit                                 | −20.2035 | 13.0731 | −1.545 | 0.1396    |
|                                                                                                                                         | Saccades                                       | −2.5183  | 12.4570 | −0.202 | 0.8421    |
|                                                                                                                                         | Ocular Motility                                | −0.8547  | 9.0261  | −0.095 | 0.9256    |
|                                                                                                                                         | Contrast Sensitivity                           | −22.5585 | 10.2020 | −2.211 | 0.0402 *  |

\*  $p < 0.05$ ; \*\*  $p < 0.01$

**Table S2.** Ordinal and logistic regression models for cognitive visual and learning abilities assessment.

|                                                                                                                                                                                                                     |                                                | <b>Coefficient</b> | <b>Standard Error</b> | <b>t Value</b> | <b>p Value</b> |
|---------------------------------------------------------------------------------------------------------------------------------------------------------------------------------------------------------------------|------------------------------------------------|--------------------|-----------------------|----------------|----------------|
| <b>VMI</b><br><b>(Developmental</b><br><b>Test of Visual-</b><br><b>Motor</b><br><b>Integration)</b><br><br><b>overall</b><br><b>significance</b><br><b>p = 0.026</b>                                               | Best Corrected Visual Acuity<br>(for near)     | −2.0062            | 0.9543                | −2.1023        | 0.0355 *       |
|                                                                                                                                                                                                                     | Best Corrected Visual Acuity<br>(for distance) | 2.7518             | 1.3224                | 2.0809         | 0.0374 *       |
|                                                                                                                                                                                                                     | Fixation                                       | 2.3153             | 1.9112                | 1.2114         | 0.2257         |
|                                                                                                                                                                                                                     | Smooth Pursuit                                 | 4.2792             | 2.1423                | 1.9975         | 0.0458 *       |
|                                                                                                                                                                                                                     | Saccades                                       | −1.6836            | 1.6188                | −1.0401        | 0.2983         |
|                                                                                                                                                                                                                     | Ocular Motility                                | −0.4568            | 1.8860                | −0.2422        | 0.8086         |
|                                                                                                                                                                                                                     | Contrast Sensitivity                           | 1.5055             | 1.3745                | 1.0953         | 0.2734         |
| <b>VMI-V</b><br><b>(Visual</b><br><b>Perception)</b><br><br><b>overall</b><br><b>significance</b><br><b>p &lt; 0.001</b>                                                                                            | Best Corrected Visual Acuity<br>(for near)     | −2.7694            | 1.3455                | −2.0582        | 0.0396 *       |
|                                                                                                                                                                                                                     | Best Corrected Visual Acuity<br>(for distance) | 6.1976             | 2.2755                | 2.7236         | 0.0065 *       |
|                                                                                                                                                                                                                     | Fixation                                       | 3.1211             | 1.9085                | 1.6354         | 0.1020         |
|                                                                                                                                                                                                                     | Smooth Pursuit                                 | 6.7864             | 2.6342                | 2.5763         | 0.0100 *       |
|                                                                                                                                                                                                                     | Saccades                                       | −1.6454            | 1.7261                | −0.9533        | 0.3405         |
|                                                                                                                                                                                                                     | Ocular Motility                                | 0.4234             | 1.4335                | 0.2953         | 0.7677         |
|                                                                                                                                                                                                                     | Contrast Sensitivity                           | 3.0431             | 1.7766                | 1.7129         | 0.0867         |
| <b>VMI-M</b><br><b>(Motor</b><br><b>Coordination)</b><br><br><b>overall</b><br><b>significance</b><br><b>p = 0.007</b>                                                                                              | Best Corrected Visual Acuity<br>(for near)     | 0.4579             | 1.3199                | 0.3470         | 0.7286         |
|                                                                                                                                                                                                                     | Best Corrected Visual Acuity<br>(for distance) | 0.8223             | 1.6133                | 0.5097         | 0.6103         |
|                                                                                                                                                                                                                     | Fixation                                       | 1.8018             | 2.4069                | 0.7486         | 0.4541         |
|                                                                                                                                                                                                                     | Smooth Pursuit                                 | 4.5275             | 2.1086                | 2.1472         | 0.0318 *       |
|                                                                                                                                                                                                                     | Saccades                                       | −3.1166            | 1.7023                | −1.8308        | 0.0671         |
|                                                                                                                                                                                                                     | Ocular Motility                                | 0.0538             | 2.3994                | 0.0224         | 0.9821         |
|                                                                                                                                                                                                                     | Contrast Sensitivity                           | 0.8697             | 1.3432                | 0.6475         | 0.5173         |
| <b>DTPV-GVP</b><br><b>(Developmental</b><br><b>Test for Visual</b><br><b>Perception-</b><br><b>General</b><br><b>Visual-</b><br><b>Perceptual)</b><br><br><b>overall</b><br><b>significance</b><br><b>p = 0.157</b> | Best Corrected Visual Acuity<br>(for near)     | −0.6271            | 0.6678                | −0.9391        | 0.3477         |
|                                                                                                                                                                                                                     | Best Corrected Visual Acuity<br>(for distance) | 1.7207             | 0.9336                | 1.8431         | 0.0653         |
|                                                                                                                                                                                                                     | Fixation                                       | 1.7541             | 1.3755                | 1.2753         | 0.2022         |
|                                                                                                                                                                                                                     | Smooth Pursuit                                 | 1.7977             | 1.6784                | 1.0711         | 0.2841         |
|                                                                                                                                                                                                                     | Saccades                                       | −0.3167            | 1.7684                | −0.1791        | 0.8579         |
|                                                                                                                                                                                                                     | Ocular Motility                                | 0.0041             | 1.1579                | 0.0036         | 0.9972         |
|                                                                                                                                                                                                                     | Contrast Sensitivity                           | 1.1336             | 1.0395                | 1.0906         | 0.2755         |

|                                                                                                                                                 |                                                |         |           |         |         |
|-------------------------------------------------------------------------------------------------------------------------------------------------|------------------------------------------------|---------|-----------|---------|---------|
| <b>DTPV-NMVP</b><br>(Non-Motor Visual-Perceptual)<br><br>overall<br>significance<br>$p = 0.238$                                                 | Best Corrected Visual Acuity<br>(for near)     | 0.1251  | 0.5365    | 0.2333  | 0.8156  |
|                                                                                                                                                 | Best Corrected Visual Acuity<br>(for distance) | 1.2103  | 0.7367    | 1.6428  | 0.1004  |
|                                                                                                                                                 | Fixation                                       | 0.3315  | 0.8818    | 0.3759  | 0.7070  |
|                                                                                                                                                 | Smooth Pursuit                                 | 0.7177  | 1.3354    | 0.5375  | 0.5909  |
|                                                                                                                                                 | Saccades                                       | 0.4423  | 1.3786    | 0.3209  | 0.7483  |
|                                                                                                                                                 | Ocular Motility                                | −0.0164 | 0.8252    | −0.0198 | 0.9842  |
|                                                                                                                                                 | Contrast Sensitivity                           | 0.5775  | 0.8645    | 0.6681  | 0.5041  |
| <b>DTPV-VMI</b><br>(Visual-Motor Integration)<br><br>overall<br>significance<br>$p = 0.096$                                                     | Best Corrected Visual Acuity<br>(for near)     | 0.0897  | 0.4623    | 0.1940  | 0.8462  |
|                                                                                                                                                 | Best Corrected Visual Acuity<br>(for distance) | −0.7498 | 0.4349    | −1.7240 | 0.0847  |
|                                                                                                                                                 | Fixation                                       | −0.7824 | 0.7139    | −1.0959 | 0.2731  |
|                                                                                                                                                 | Smooth Pursuit                                 | 1.4492  | 1.0111    | 1.4333  | 0.1518  |
|                                                                                                                                                 | Saccades                                       | −2.0781 | 1.0572    | −1.9657 | 0.0493* |
|                                                                                                                                                 | Ocular Motility                                | 1.5491  | 0.6929    | 2.2355  | 0.0254* |
|                                                                                                                                                 | Contrast Sensitivity                           | 0.3354  | 0.7141    | 0.4697  | 0.6385  |
| <b>DDE-MF-VEL</b><br>(Battery for Dyslexia and Developmental Dysorthography – Meaningful - Speed)<br><br>overall<br>significance<br>$p = 0.312$ | Best Corrected Visual Acuity<br>(for near)     | −1.1329 | 1.0549    | −1.074  | 0.2829  |
|                                                                                                                                                 | Best Corrected Visual Acuity<br>(for distance) | 1.2037  | 1.1222    | 1.073   | 0.2834  |
|                                                                                                                                                 | Fixation                                       | 1.1852  | 1.4829    | 0.799   | 0.4242  |
|                                                                                                                                                 | Smooth Pursuit                                 | 2.2146  | 1.5272    | 1.450   | 0.1470  |
|                                                                                                                                                 | Saccades                                       | −2.9326 | 1.9064    | −1.538  | 0.1240  |
|                                                                                                                                                 | Ocular Motility                                | 1.0753  | 1.4423    | 0.746   | 0.4559  |
|                                                                                                                                                 | Contrast Sensitivity                           | 2.1349  | 1.2322    | 1.733   | 0.0832  |
| <b>DDE-MF-ERR</b><br>(Battery for Dyslexia and Developmental Dysorthography – Meaningful - Error)<br><br>overall<br>significance<br>$p = 0.160$ | Best Corrected Visual Acuity<br>(for near)     | −1.2851 | 1.7830    | −0.721  | 0.471   |
|                                                                                                                                                 | Best Corrected Visual Acuity<br>(for distance) | 0.1227  | 1.3767    | 0.089   | 0.929   |
|                                                                                                                                                 | Fixation                                       | 1.2909  | 2.6649    | 0.484   | 0.628   |
|                                                                                                                                                 | Smooth Pursuit                                 | 26.0830 | 4385.6549 | 0.006   | 0.995   |
|                                                                                                                                                 | Saccades                                       | −1.5850 | 3.3259    | −0.477  | 0.634   |
|                                                                                                                                                 | Ocular Motility                                | 2.4737  | 3.0477    | 0.812   | 0.417   |
|                                                                                                                                                 | Contrast Sensitivity                           | 25.9807 | 4385.6542 | 0.006   | 0.995   |
| <b>DDE-NMF-VEL</b>                                                                                                                              | Best Corrected Visual Acuity<br>(for near)     | −37.327 | 10678.207 | −0.003  | 0.997   |

|                                                                                                                                                 |                                             |          |            |        |         |
|-------------------------------------------------------------------------------------------------------------------------------------------------|---------------------------------------------|----------|------------|--------|---------|
| <b>(Battery for Dyslexia and Developmental Dysorthography – Non-Meaningful - Speed) overall significance <math>p = 0.008</math></b>             | Best Corrected Visual Acuity (for distance) | 82.100   | 31301.314  | 0.003  | 0.998   |
|                                                                                                                                                 | Fixation                                    | 113.867  | 27318.983  | 0.004  | 0.997   |
|                                                                                                                                                 | Smooth Pursuit                              | 150.806  | 36993.178  | 0.004  | 0.997   |
|                                                                                                                                                 | Saccades                                    | −113.089 | 27318.983  | −0.004 | 0.997   |
|                                                                                                                                                 | Ocular Motility                             | −5.227   | 41614.035  | 0.000  | 1.000   |
|                                                                                                                                                 | Contrast Sensitivity                        | 82.879   | 31301.313  | 0.003  | 0.998   |
| <b>DDE-NMF-ERR (Battery for Dyslexia and Developmental Dysorthography – Non-Meaningful - Error) overall significance <math>p = 0.666</math></b> | Best Corrected Visual Acuity (for near)     | 1.26771  | 0.90158    | 1.406  | 0.160   |
|                                                                                                                                                 | Best Corrected Visual Acuity (for distance) | 0.55833  | 0.87765    | 0.636  | 0.525   |
|                                                                                                                                                 | Fixation                                    | −1.72075 | 1.54763    | −1.112 | 0.266   |
|                                                                                                                                                 | Smooth Pursuit                              | −0.54766 | 1.62030    | −0.338 | 0.735   |
|                                                                                                                                                 | Saccades                                    | 1.86936  | 1.83030    | 1.021  | 0.307   |
|                                                                                                                                                 | Ocular Motility                             | 1.42975  | 1.73111    | 0.826  | 0.409   |
|                                                                                                                                                 | Contrast Sensitivity                        | 1.14796  | 1.84243    | 0.623  | 0.533   |
| <b>MT-RVEL (MT Test – Reading speed) overall significance <math>p &lt; 0.001</math></b>                                                         | Best Corrected Visual Acuity (for near)     | −29.275  | 78419.814  | 0.000  | 1.000   |
|                                                                                                                                                 | Best Corrected Visual Acuity (for distance) | −11.066  | 55025.391  | 0.000  | 1.000   |
|                                                                                                                                                 | Fixation                                    | 8.397    | 91362.532  | 0.000  | 1.000   |
|                                                                                                                                                 | Smooth Pursuit                              | 54.039   | 406658.409 | 0.000  | 1.000   |
|                                                                                                                                                 | Saccades                                    | 13.598   | 284757.764 | 0.000  | 1.000   |
|                                                                                                                                                 | Ocular Motility                             | −1.052   | 147221.439 | 0.000  | 1.000   |
|                                                                                                                                                 | Contrast Sensitivity                        | 75.665   | 122824.854 | 0.001  | 1.000   |
| <b>MT-RCOR (MT Test – Reading correctness) overall significance <math>p = 0.247</math></b>                                                      | Best Corrected Visual Acuity (for near)     | −3.557   | 4.917      | −0.723 | 0.469   |
|                                                                                                                                                 | Best Corrected Visual Acuity (for distance) | −1.739   | 2.673      | −0.651 | 0.515   |
|                                                                                                                                                 | Fixation                                    | 3.019    | 5.156      | 0.586  | 0.558   |
|                                                                                                                                                 | Smooth Pursuit                              | 4.383    | 5.218      | 0.840  | 0.401   |
|                                                                                                                                                 | Saccades                                    | −5.260   | 5.340      | −0.985 | 0.325   |
|                                                                                                                                                 | Ocular Motility                             | 4.914    | 4.571      | 1.075  | 0.282   |
|                                                                                                                                                 | Contrast Sensitivity                        | 2.931    | 4.847      | 0.605  | 0.545   |
| <b>MT-COMP</b>                                                                                                                                  | Best Corrected Visual Acuity (for near)     | −0.5644  | 0.9192     | −0.614 | 0.53920 |

|                                                                                                          |                                                |         |        |        |           |
|----------------------------------------------------------------------------------------------------------|------------------------------------------------|---------|--------|--------|-----------|
| <b>(MT Test –<br/>Reading<br/>comprehension)<br/>overall<br/>significance<br/><math>p = 0.049</math></b> | Best Corrected Visual Acuity<br>(for distance) | 0.2237  | 0.8161 | 0.274  | 0.78397   |
|                                                                                                          | Fixation                                       | 0.2872  | 0.9997 | 0.287  | 0.77389   |
|                                                                                                          | Smooth Pursuit                                 | 2.6014  | 2.2321 | 1.165  | 0.24383   |
|                                                                                                          | Saccades                                       | −2.6630 | 1.9760 | −1.348 | 0.17776   |
|                                                                                                          | Ocular Motility                                | 1.9569  | 1.3218 | 1.480  | 0.13876   |
|                                                                                                          | Contrast Sensitivity                           | 4.3645  | 1.6303 | 2.677  | 0.00743** |

\*  $p < 0.05$ ; \*\*  $p < 0.01$ .
